# Supplementary material for: Short-End Injection Capillary Electrophoresis and Multivariate Analysis for Simultaneous Determination of Heavy Metals in Passiflora incarnata Tea
Source: MDPI journal article supplement (doi:10.3390/ijerph192315994), 2022-11-30
Supplement: s1 [file s1]

## Supplementary Materials

### Figures

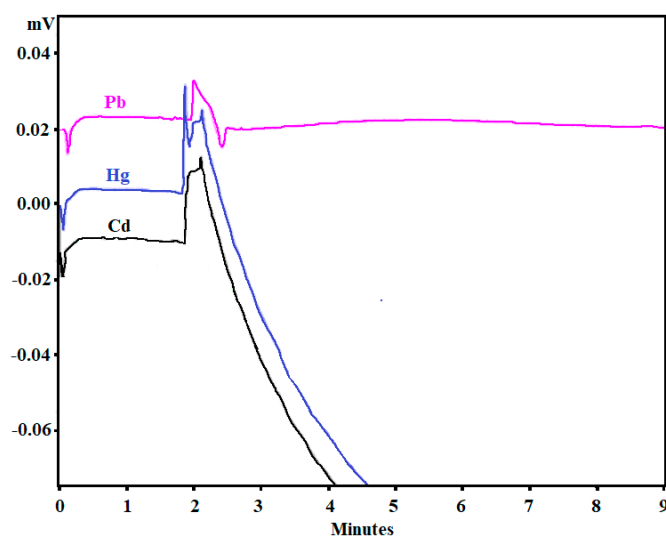

**Figure S1.** Electropherograms for Cd<sup>2+</sup>, Pb<sup>2+</sup> and Hg<sup>2+</sup> separation using lactic acid as complexant agent. Conditions: indirect mode, 38.8 cm effective length, 50 cm full length capillary, voltage 10 kV, BGE 15 mmol L<sup>-1</sup> lactic acid, 5 mmol L<sup>-1</sup> imidazole, 20% methanol, temperature at 15 °C, sample injection at 0.5 psi by 5 s and detection at 214 nm.

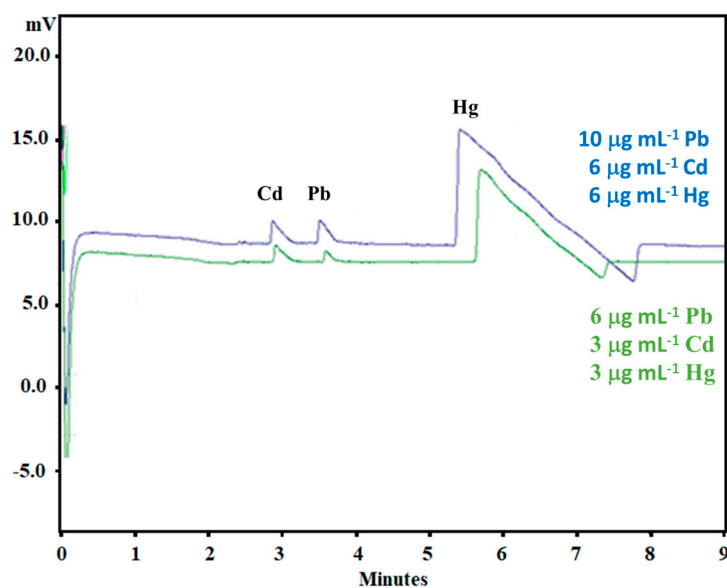

**Figure S2.** Electropherograms for  $\text{Cd}^{2+}$ ,  $\text{Pb}^{2+}$  and  $\text{Hg}^{2+}$  separation using long-term injection. Conditions: indirect mode, 38.8 cm effective length, 50 cm full-length capillary, BGE with 5 mmol  $\text{L}^{-1}$  imidazole, 6 mmol  $\text{L}^{-1}$  HIBA, 50.0 mmol  $\text{L}^{-1}$  18-crown-6, and 20% methanol, temperature at 15 °C, sample injection at 0.5 psi by 5 s and detection at 214 nm.
